# Supplementary material for: A high-efficiency hybrid white organic light-emitting diode enabled by a new blue fluorophor
Source: Royal Society of Chemistry journal article supplement (doi:10.1039/c5tc00285k), 2015-01-01
Supplement: c5tc00285k1.pdf [file c5tc00285k1.pdf]

## Experimental Section

### General Procedures

$^1\text{H}$  NMR and  $^{13}\text{C}$  NMR spectra were measured with a Varian Gemini-400 Varian spectrometer. Mass spectra were recorded on a Finnigan 4021C GC-MS spectrometer. The absorption and photoluminescence spectra were recorded on a Hitachi U-3010 UV-vis spectrophotometer and a Hitachi F-4600 fluorescence spectrophotometer, respectively. The phosphorescence spectrum was measured in 2-MeTHF glass matrix at 77 K using a Hitachi F-4600 fluorescence spectrometer. Cyclic voltammetry was performed on a CHI660E electrochemical analyzer. The electrolytic cell was a conventional three-electrode cell in which a glassy carbon working electrode, a platinum wire auxiliary electrode, and an aqueous saturated calomel electrode (SCE) as the reference electrode were employed. The ferrocene/ferrocenium couple was used as the internal standard. Tetra-*n*-butylammoniumhexafluorophosphate (TBAPF<sub>6</sub>, 0.10 M) was used as the supporting electrolyte and DMF as the solvent, respectively.

### Synthesis

Commercially available reagents and materials were used without further purification. The synthetic route of SOTPA is outlined in Scheme 1.

*4-bromo-diphenylsulfide*. Diphenylsulfide (3.34 mL, 20 mmol) was dissolved in a mixed solution of  $\text{CH}_2\text{Cl}_2$  and  $\text{H}_2\text{O}$  (1:1, 150 mL). Then 30% hydrogen peroxide (0.86 mL, 36 mmol) and bromine (1 mL, 20 mmol) were added, and the reaction solution was continuously stirred for 6 h. The resulting mixture was extracted with  $\text{CH}_2\text{Cl}_2$  with surplus bromine removed by saturated  $\text{Na}_2\text{SO}_3$  solution. After removing the  $\text{CH}_2\text{Cl}_2$  solvent, the residue was further purified by silica gel column chromatography (petroleum ether) to give 4.57 g (86%) a white solid.  $^1\text{H}$  NMR (400 MHz,  $\text{CDCl}_3$ )  $\delta$  (ppm) 7.44 (s, 2H), 7.42 (s, 2H), 7.19 (dd,  $J$  = 8.2, 2.7 Hz, 5H). EI MS ( $m/z$ ): 265.94.

*4-bromo-diphenylsulfone*. 4-bromo-diphenylsulfide (2.66g, 10mmol),  $\text{KMnO}_4$  (8.0 g, 50.6 mmol), and  $\text{MnSO}_4$  monohydrate (8.0 g, 47.3 mmol) were stirred continuously in  $\text{CH}_2\text{Cl}_2$  (75 mL) for 10 h. After that, the reaction mixture was filtered, and the residue was washed with additional  $\text{CH}_2\text{Cl}_2$ . The crude product was obtained by evaporation of the collected  $\text{CH}_2\text{Cl}_2$  and was further purified via silica gel column chromatography using  $\text{CH}_2\text{Cl}_2$ /petroleum ether (2:1) as the eluent to give 2.45 g (83%) a white solid.  $^1\text{H}$  NMR (400 MHz,  $\text{CDCl}_3$ )  $\delta$  (ppm) 7.95 – 7.91 (m, 2H), 7.83 – 7.77 (m, 2H), 7.68 – 7.61 (m, 2H), 7.58 (dd,  $J$  = 6.0, 3.9 Hz, 1H), 7.55 – 7.48 (m, 2H). EI MS ( $m/z$ ): 295.95.

*4-(4-diphenylaminophenyl)diphenylsulfone (SOTPA)*. Toluene (22.5 mL), ethanol (7.5 mL), and 2 M aqueous  $\text{Na}_2\text{CO}_3$  (15 mL) were added to a mixture of 4-bromo-diphenylsulfone (1.48 g, 5 mmol), 4-diphenylaminophenylboronic acid (2.89 g, 10 mmol), and

tetrakis(triphenylphosphine)platinum (585 mg, 0.5 mmol). With stirring, the suspension was heated at 90°C for 24 h under nitrogen atmosphere. When cooled to room temperature, the mixture was extracted with CH<sub>2</sub>Cl<sub>2</sub> and dried over Na<sub>2</sub>SO<sub>4</sub>. After the solvent had been removed, the residue was purified by column chromatography on silica gel using CH<sub>2</sub>Cl<sub>2</sub>/petroleum ether (3:1) as the eluent to give 1.56 g (73%) a white solid. <sup>1</sup>H NMR (400 MHz, DMSO) δ (ppm) 8.01 – 7.93 (m, 4H), 7.84 (d, *J* = 8.7 Hz, 2H), 7.68 (ddd, *J* = 6.3, 3.7, 1.3 Hz, 1H), 7.66 – 7.59 (m, 4H), 7.37 – 7.29 (m, 4H), 7.14 – 7.03 (m, 6H), 6.99 (d, *J* = 8.8 Hz, 2H). <sup>13</sup>C NMR (101 MHz, CDCl<sub>3</sub>) δ (ppm) 147.38, 145.68, 142.14, 139.52, 133.04, 129.72, 129.44, 129.27, 129.16, 128.27, 128.02, 127.66, 127.17, 125.01, 123.61, 123.05. EI MS (*m/z*): 461.16.

### Quantum Calculation

Theoretical calculation of the compound was carried out using the Gaussian-03 program. Density functional theory (DFT) B3LPY/6-31G (d) was used to determine and optimize the structure

### Device Fabrication and Measurement

ITO-coated glasses with a sheet resistance of 30 Ω per square were used as substrates. Before device fabrication, the ITO glass substrates were cleaned with isopropyl alcohol and deionized water, dried in an oven at 120 °C, treated with UV-ozone, and finally transferred to a vacuum deposition system with a base pressure better than 1 × 10<sup>-6</sup> torr for organic and metal deposition. Thermally evaporated organic materials were sequentially deposited at a rate of 1–2 Å s<sup>-1</sup> onto the ITO substrates. The cathode was completed by thermal deposition of LiF at a deposition rate of 0.1 Å s<sup>-1</sup>, and then capped with Al metal deposited at a rate of 10 Å s<sup>-1</sup>. EL luminescence spectra and CIE color coordinates were measured with a Spectrascan PR650 photometer, and the current-voltage characteristics were measured with a computer-controlled Keithley 2400 SourceMeter under ambient atmosphere. EQE was calculated from the current density, luminance, and EL spectrum, assuming a Lambertian distribution. The emitting area of the device is 0.1 cm<sup>2</sup>.

## Supporting Information

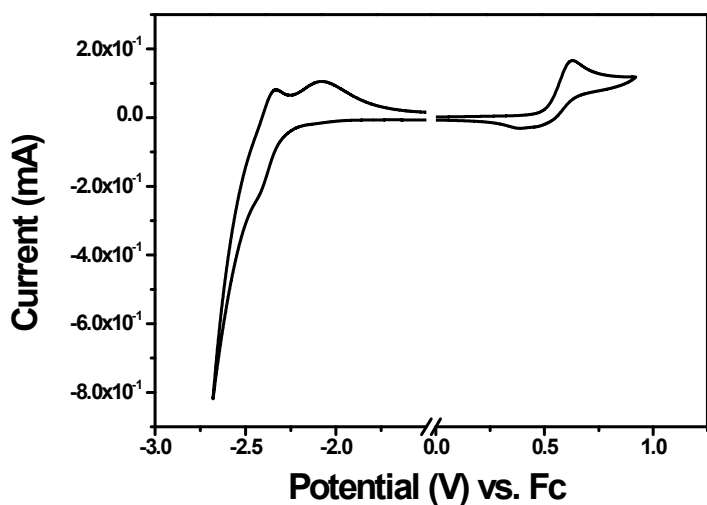

**Figure S1.** Cyclic voltammograms of SOTPA in DMF with 0.1 M  $\text{Bu}_4\text{NPF}_6$  as a supporting electrolyte, saturated calomel electrode (SCE) as a reference electrode, Pt disk as a working electrode, and a scan rate of  $100 \text{ mV s}^{-1}$ .  $\text{Fc}/\text{Fc}^+$  was used as external reference.

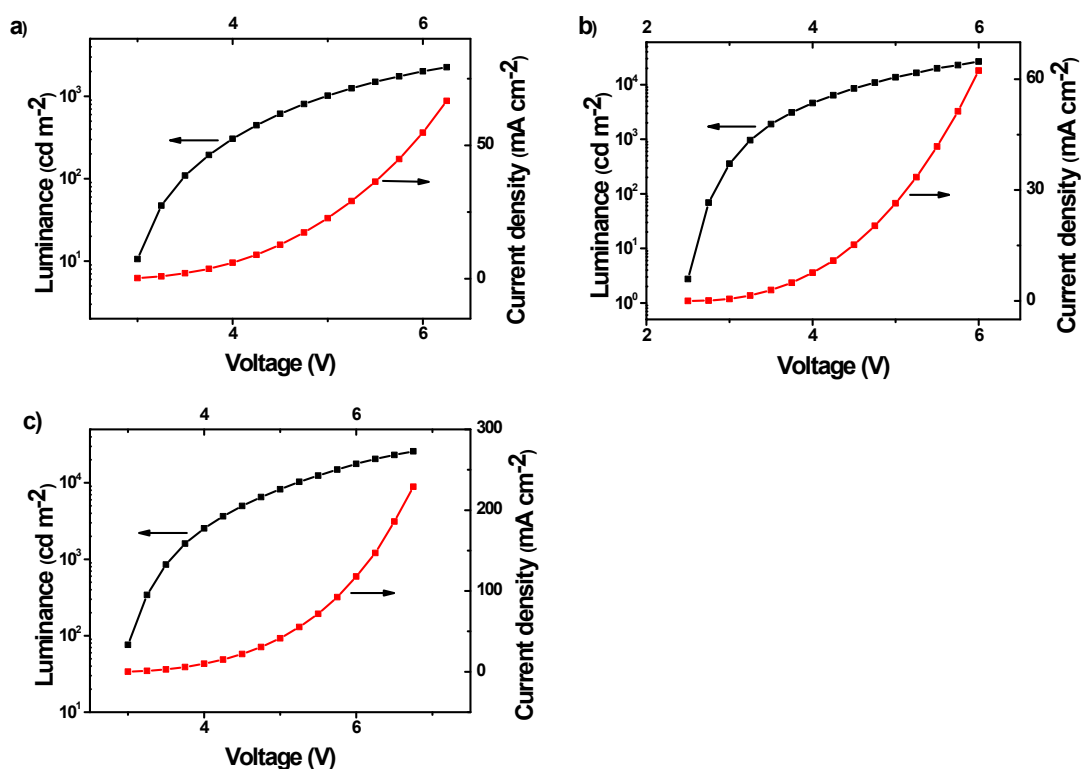

**Figure S2.** Luminance-voltage-current density characteristics of (a) device B, (b) device G and (c) device R.

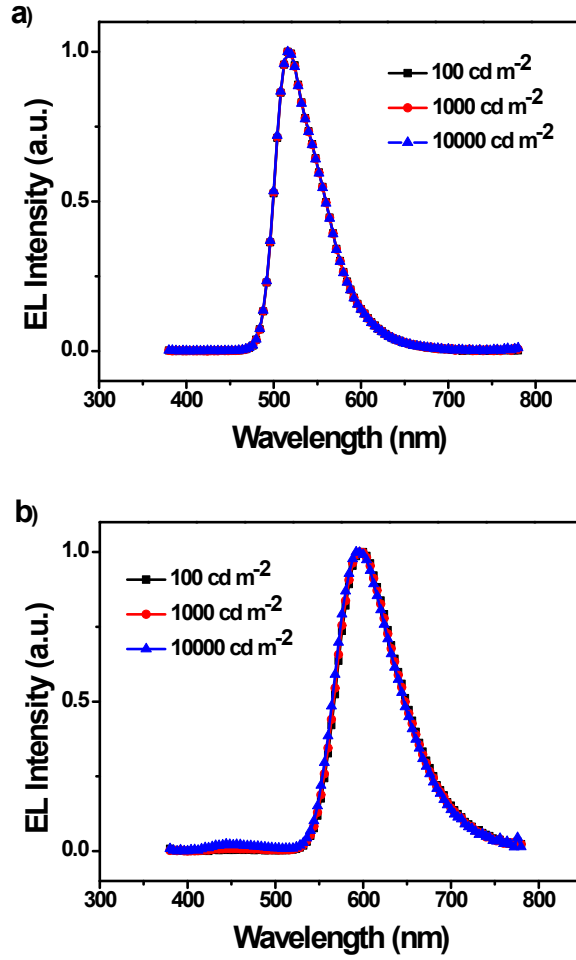

**Figure S3.** EL spectra of (a) device G and (b) device R.

**Table S1.** The CIE coordinates of the SOTPA based single-EML F–P hybrid WOLED (device W).

| Luminance | 100 cd m <sup>-2</sup> | 1000 cd m <sup>-2</sup> | 10000 cd m <sup>-2</sup> |
|-----------|------------------------|-------------------------|--------------------------|
| CIE(x, y) | (0.46, 0.46)           | (0.45, 0.44)            | (0.39, 0.39)             |
